# Supplementary figures and images for: Integrin α3 blockade enhances microtopographical down-regulation of α-smooth muscle actin: role of microtopography in ECM regulation
Source: Royal Society of Chemistry journal article supplement (doi:10.1039/c1ib00012h), 2011-01-01

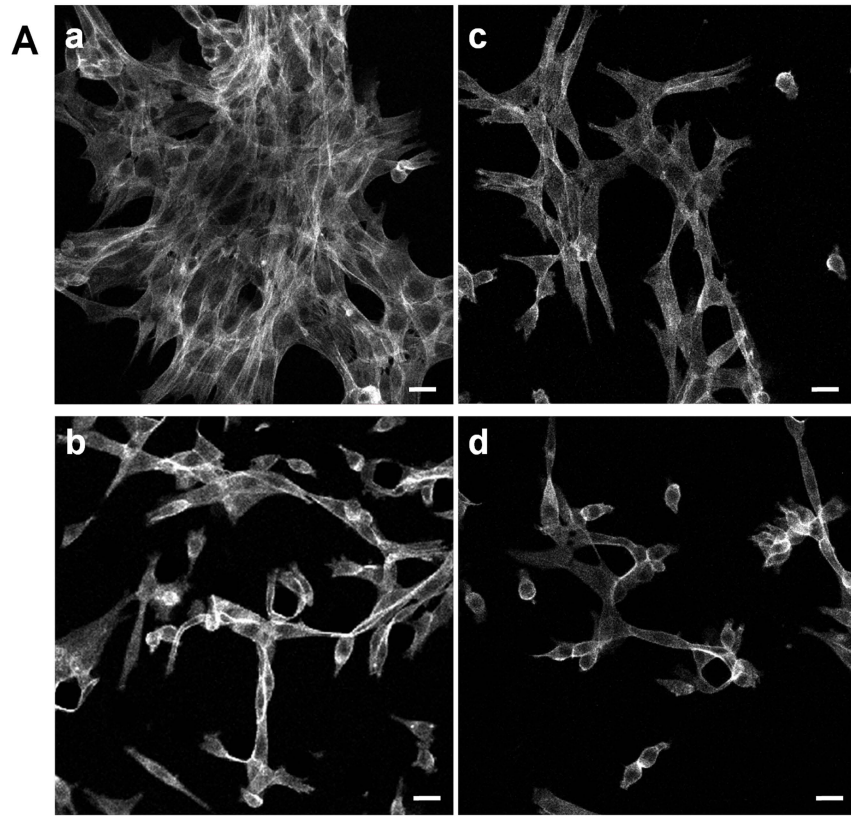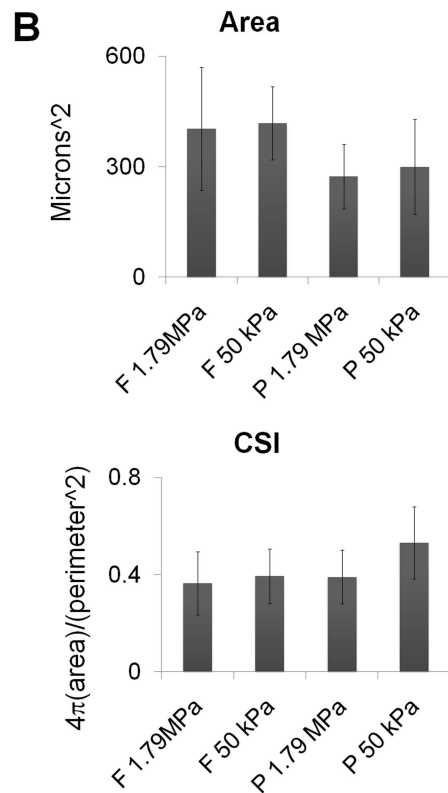

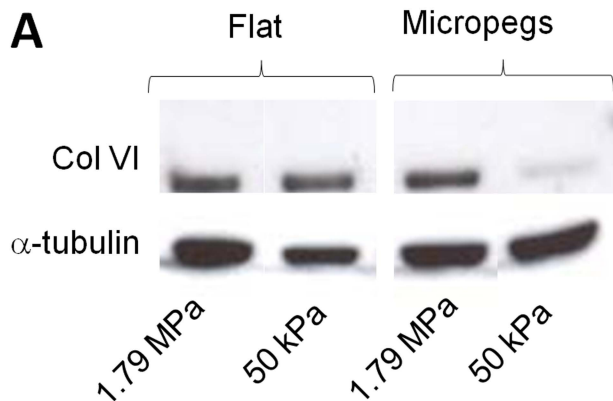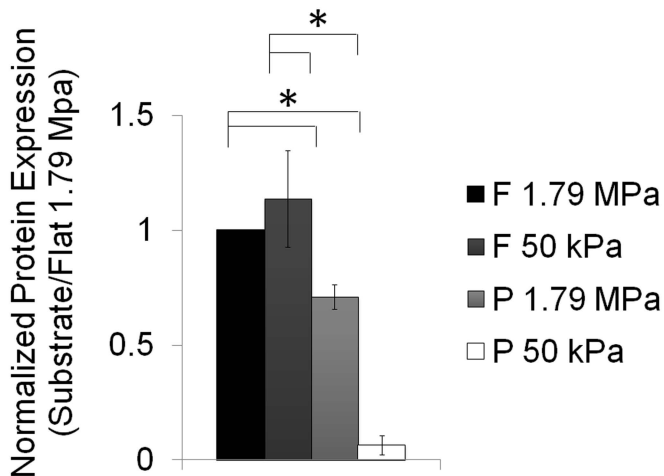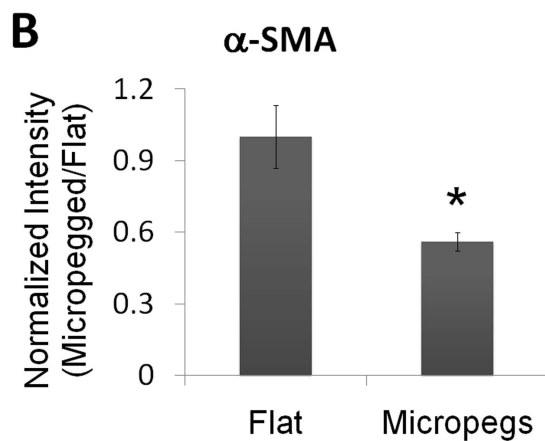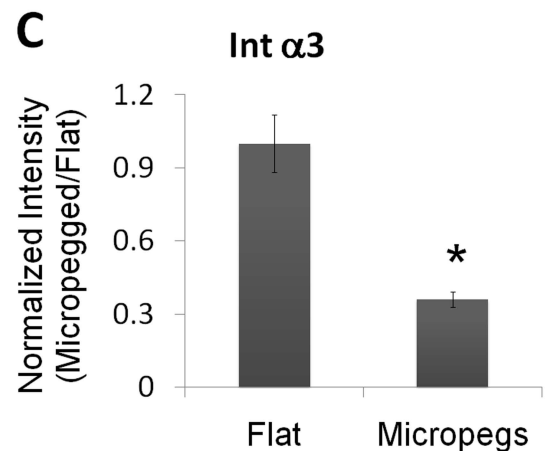

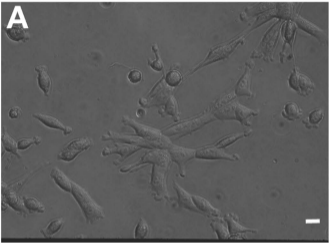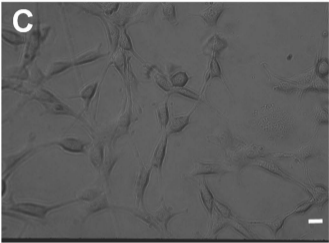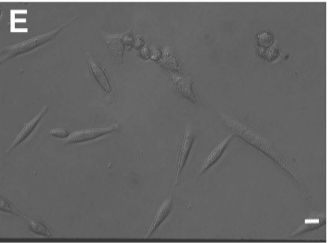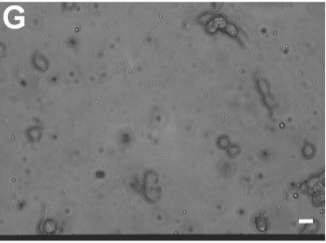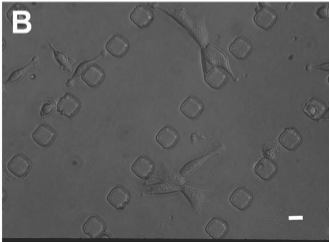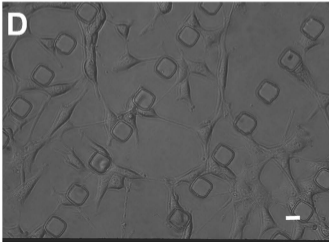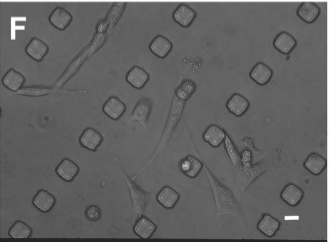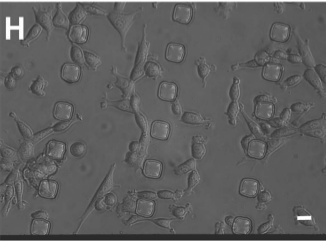

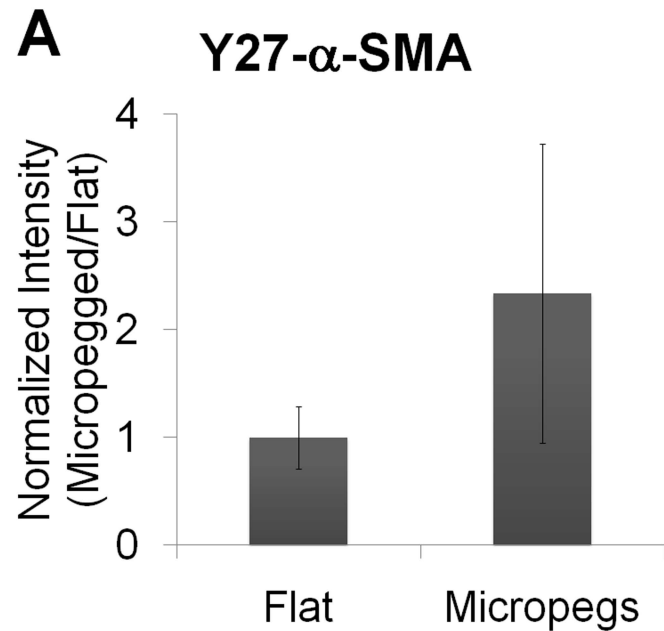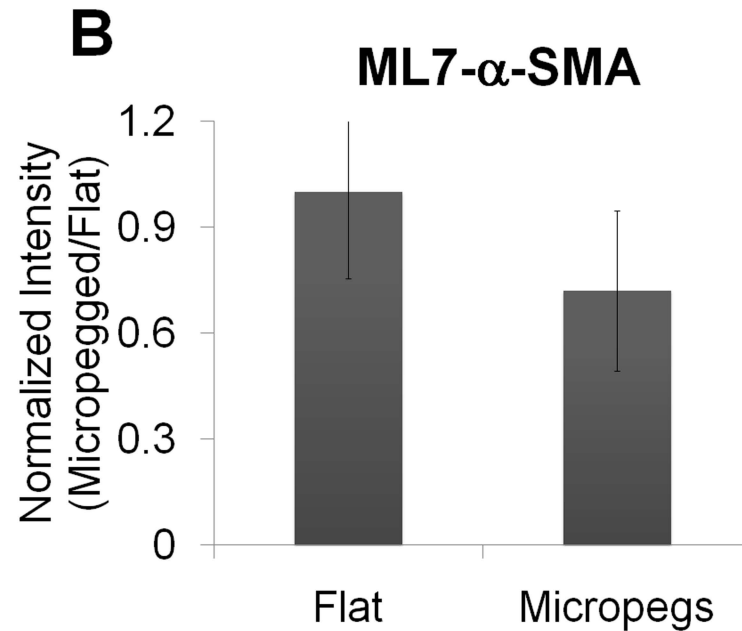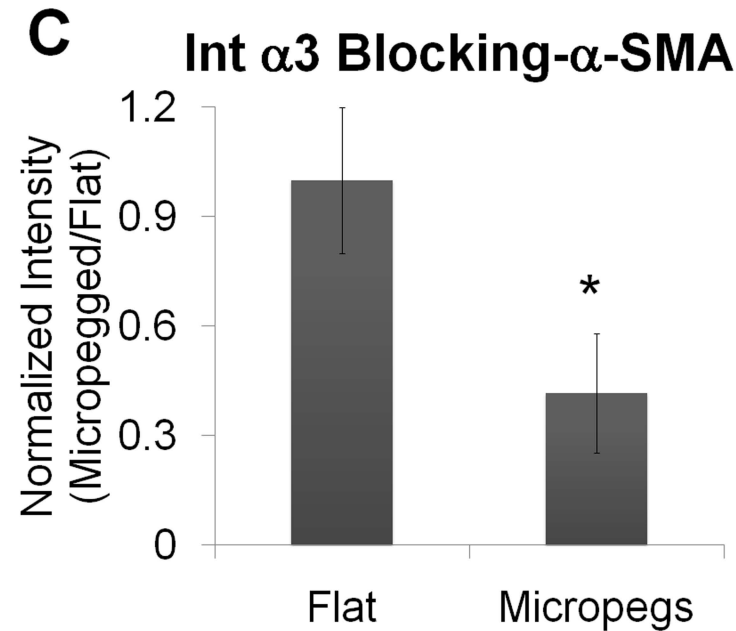

Supplement: c1ib00012h.pdf [file c1ib00012h.pdf]
